# Supplementary material for: Deficiency of Phospholipase A2 Group 7 Decreases Intestinal Polyposis and Colon Tumorigenesis in ApcMin /+ Mice
Source: Oxford University Press journal article supplement (doi:10.1158/0008-5472.can-12-2374), 2013-01-29
Supplement: 00085472can122374-sup-fig1.pdf [file 00085472can122374-sup-fig1.pdf]

Figure S1

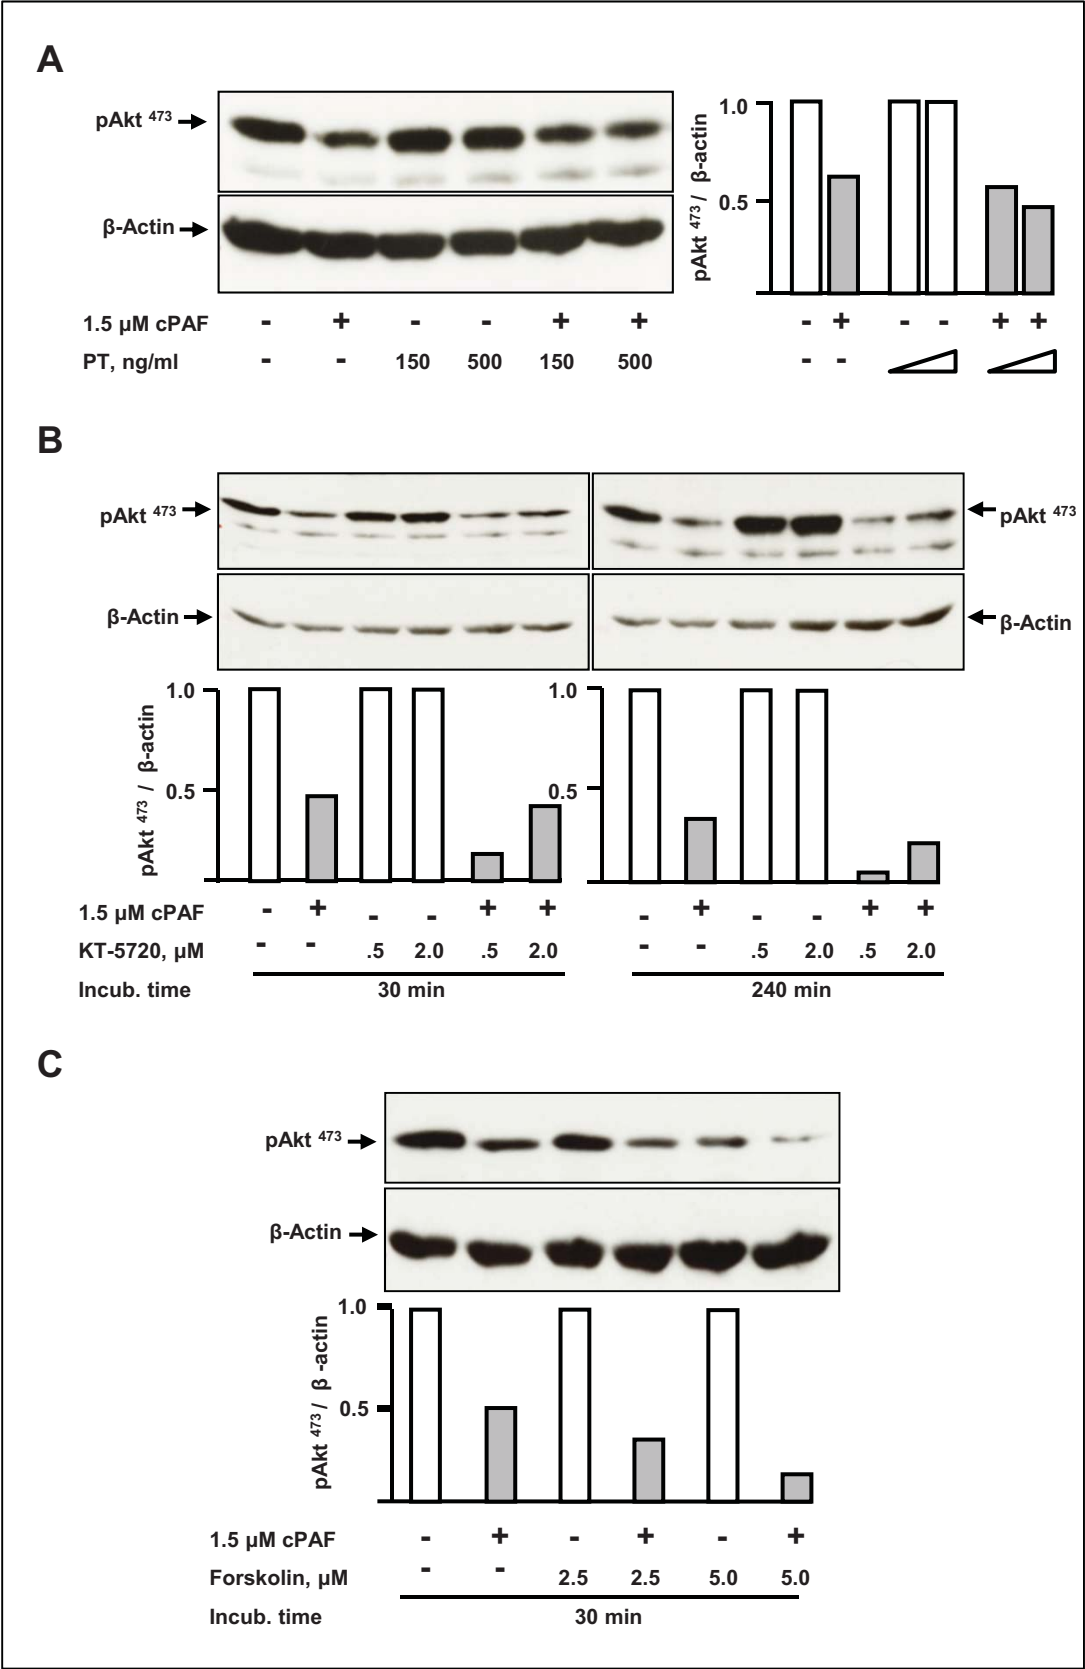

**Figure S1. cPAF-induced de-phosphorylation of pAKT<sup>473</sup> does not require Gα<sub>i</sub>/ Gα<sub>o</sub> or PKA**

**A.** HT-29 cells were starved overnight in the absence and presence of pertussis toxin (PT), in serum-free medium. We then stimulated the cells with cPAF for 30 min and determined pAkt<sup>473</sup> and β-actin levels using immunoblot analyses.

**B & C.** We pre-incubated starved HT-29 cells with the PKA inhibitor KT520 (**B**) or the PKA activator forskolin (**C**) for 60 min at 37°C. The cells then were treated with cPAF or vehicle for 30 and 240 min (**B**) or for 30 min (**C**), and the levels of pAkt<sup>473</sup> and β-actin were assessed using immunoblot analyses, as described in *Materials and Methods*.
